# Supplementary material for: The altered metabolites contributed by dysbiosis of gut microbiota are associated with microbial translocation and immune activation during HIV infection
Source: PubMed Central journal article supplement (PMC9845923; doi:10.3389/fimmu.2022.1020822), 2023-01-04
Supplement: DataSheet_1.pdf [file DataSheet_1.pdf]

Spearman Correlation Heatmap

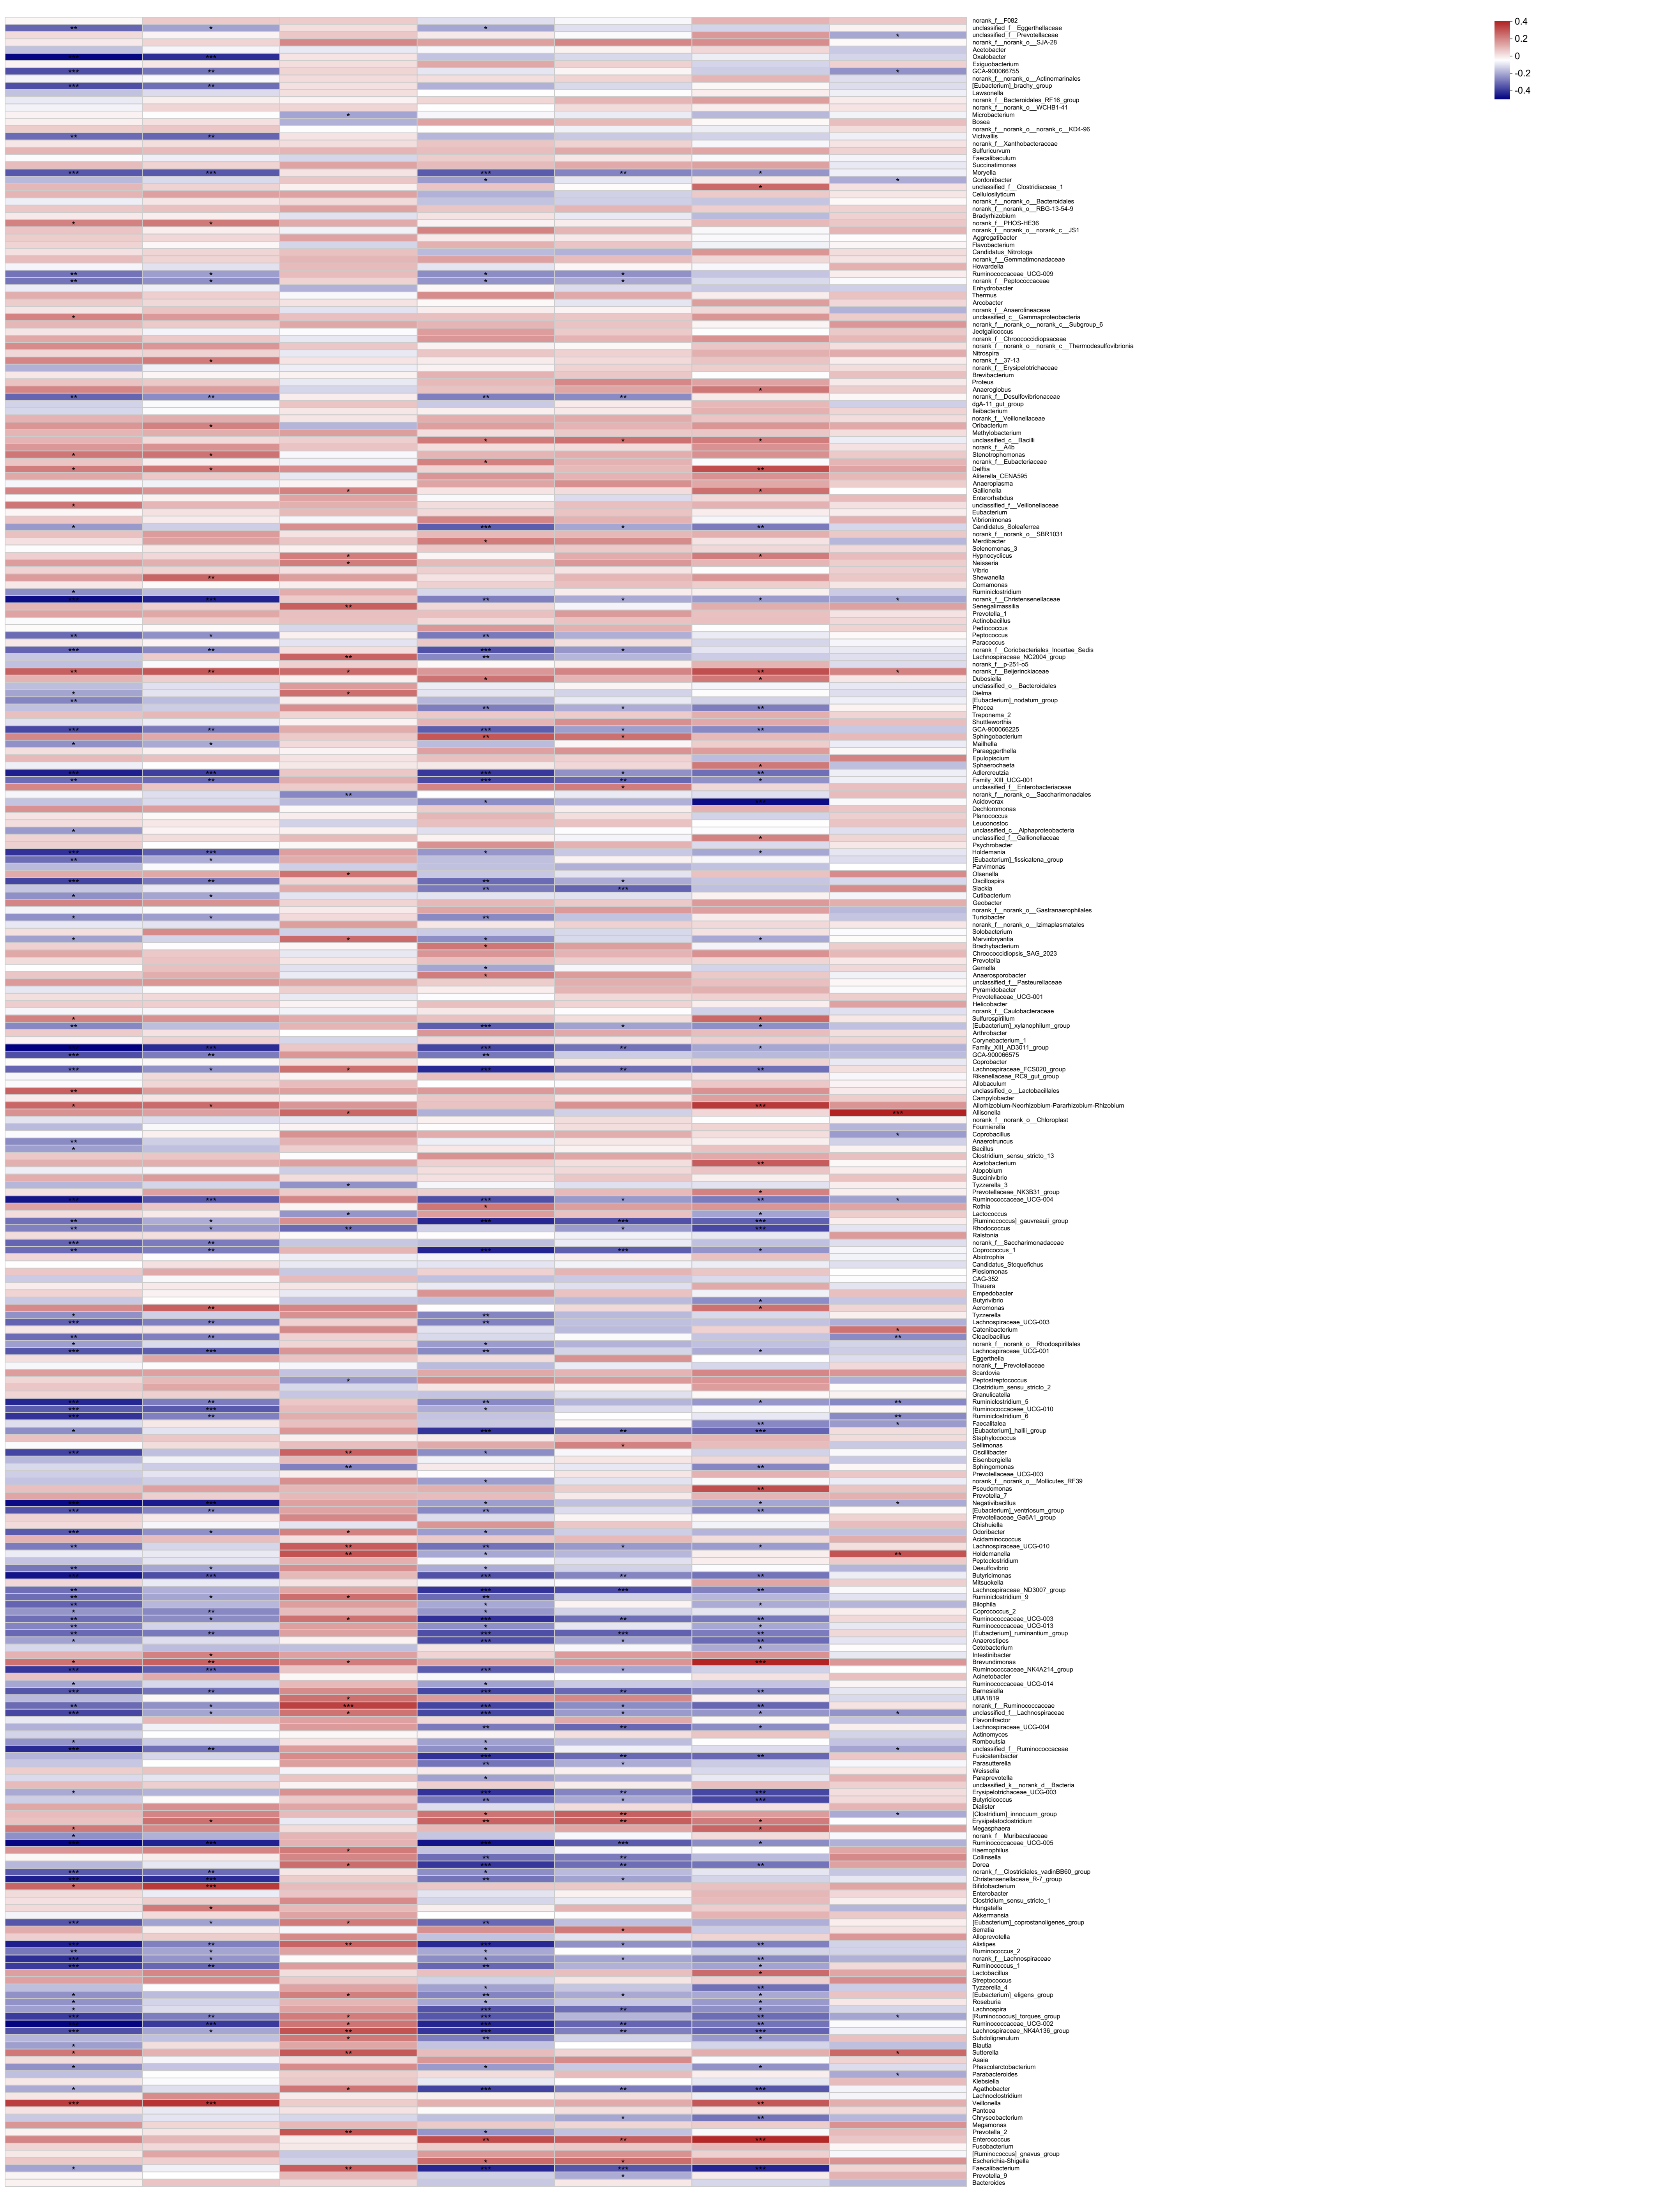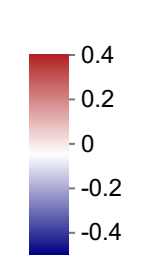

Putrescine  
N\_Acetylputrescine  
Spermidine  
Phenylethylamine  
Indolylpyrroline  
L\_Tryptophan  
Cadaverine

norank\_f\_F02  
undclassified\_f\_Eggerthellaceae  
undclassified\_f\_Prevotellaceae  
norank\_f\_norank\_o\_SJA20  
Akkobacter  
Oribacter  
Eggo bacterium  
GCA1000755  
norank\_f\_norank\_o\_Actinomatales  
[Eubacterium]\_linciv\_group  
Lawsonella  
norank\_f\_Bacteroides\_RF16\_group  
norank\_f\_norank\_o\_WCH81-41  
Mirobacterium  
Bossea  
norank\_f\_norank\_o\_norank\_c\_KD4-96  
Viduaella  
norank\_f\_Xanthobacteraceae  
Sulfuricum  
Faecalibacterium  
Succinatimonas  
Moryella  
Oribacterium  
undclassified\_f\_Clostridiales\_1  
Cellulolyticum  
norank\_f\_norank\_o\_Bacteroidales  
norank\_f\_norank\_o\_RBG-13-54-9  
Brachymicrobium  
norank\_f\_PHOS-E36  
norank\_f\_norank\_o\_norank\_c\_JS1  
Aggregatibacter  
Flavobacterium  
Candidatus\_Nitrospira  
norank\_f\_Gemmatimonadaceae  
Howardella  
Ruminococcaceae\_UCG-009  
norank\_f\_Peptococcaceae  
Erythrobacter  
Thermus  
Akkobacter  
norank\_f\_Anarcthiaceae  
undclassified\_c\_Gemmatimonadota  
norank\_f\_norank\_o\_norank\_c\_Subgroup\_6  
Jodgallifoccus  
norank\_f\_Chroococcidopsaceae  
norank\_f\_norank\_o\_norank\_c\_Thermodesulfobionta  
Nitrospira  
norank\_f\_37-13  
norank\_f\_Erythrobacteraceae  
Brevibacterium  
Proteus  
Anaeroglobus  
norank\_f\_Desulfobiontaceae  
sga-11\_group  
Ileobacterium  
norank\_f\_Valloniellaceae  
Oribacterium  
Methylobacterium  
undclassified\_c\_Bacti  
norank\_f\_A42  
Stenotrophomonas  
norank\_f\_Eubacteriaceae  
Dafnia  
Alteibacter\_CENA565  
Anaeroplasm  
Gallionella  
Enterorhabdus  
undclassified\_f\_Valloniellaceae  
Eubacterium  
Moryobacterium  
Candidatus\_Selolisma  
norank\_f\_norank\_o\_SBR1031  
Mirobacterium  
Selenomonas\_3  
Hydrocyclopus  
Neseria  
Vibrio  
Shewanella  
Cultivans  
Ruminococcoidium  
norank\_f\_Christensenellaceae  
Senegalimassilia  
Pirella\_1  
Akkobacterium  
Pepidococcus  
Pepidococcus  
Pepidococcus  
norank\_f\_Corinbacteriales\_Incrae\_Sedis  
Lachnospiraceae\_NC209\_group  
norank\_f\_p-25-1-05  
norank\_f\_Dermococcaceae  
Dubosella  
undclassified\_c\_Bacteroidales  
Dialma  
[Eubacterium]\_rodatum\_group  
Phocaea  
Tropaea\_2  
Shulzevorkia  
GCA1000225  
Springbacterium  
Methylobacterium  
Parasagittella  
Erythrobacterium  
Sphaerobacter  
Adlerella  
Family\_XII\_UCG-001  
undclassified\_f\_Enterobacteriaceae  
norank\_f\_norank\_o\_Saccharimonadates  
Andriana  
Dechloromonas  
Planctomyces  
Leuconostoc  
undclassified\_c\_Alphaproteobacteria  
undclassified\_f\_Gallionellaceae  
Pyrrodicticum  
Holdeibacter  
[Eubacterium]\_festuana\_group  
Pantomonas  
Oribella  
Oribella  
Cultivans  
Gedonea  
norank\_f\_norank\_o\_Gastranaerophilales  
Turbidibacter  
norank\_f\_norank\_o\_Limniasmatates  
Marvinbryantia  
Brachydictyon  
Chroococcidopsis\_SAG\_2023  
Pirella  
Gemella  
Anaerobacterium  
undclassified\_f\_Pasteurellaceae  
Pyrrodicticum  
Pyrrodicticum\_UCG-001  
Helicobacter  
norank\_f\_Caulobacteraceae  
Sulfuricum  
[Eubacterium]\_xylophilum\_group  
Akkobacterium  
Family\_XII\_A03011\_group  
GCA10006075  
Coprothermobacter  
Lachnospiraceae\_FCS20\_group  
Rheinococcus\_R01\_group  
Alkalicoccus  
undclassified\_c\_Lactobacillales  
Carnyobacter  
Alkalicoccus\_Neohizobium-Parahizobium-Rhizobium  
Alkalicoccus  
norank\_f\_norank\_o\_Chloroplast  
Fournierella  
Coprothermobacter  
Andriana  
Bacterium\_sensu\_stricto\_13  
Akkobacterium  
Alkalicoccus  
Succinatimonas  
Tyzzerella\_3  
Pirellaceae\_NC381\_group  
Ruminococcaceae\_UCG-004  
Rheila  
Lactococcus  
[Ruminococcus]\_gammavul\_group  
Rhodococcus  
Rheila  
norank\_f\_Saccharimonadaceae  
Coprothermobacter  
Alkalicoccus  
Candidatus\_Steinhalmschulzei  
Pantomonas  
CAG-303  
Thaera  
Empedobacter  
Butyrivibrio  
Akkobacterium  
Tyzzerella  
Lachnospiraceae\_UCG-003  
Cultivans  
Chroococcidopsis  
norank\_f\_norank\_o\_Rhodospirillales  
Lachnospiraceae\_UCG-001  
Eggerthella  
norank\_f\_Prevotellaceae  
Succinatimonas  
Pepidococcus  
Candidatus\_Selolisma  
norank\_f\_norank\_o\_norank\_c\_KD4-96  
Gedonea  
Lachnospiraceae\_UCG-010  
Helicobacterium  
Desulfobrio  
Butyrivibrio  
Moryobacterium  
Lachnospiraceae\_ND3007\_group  
Ruminococcoidium\_3  
Brevibacterium  
Coprothermobacter\_2  
Ruminococcaceae\_UCG-003  
Ruminococcaceae\_UCG-013  
[Eubacterium]\_rumicantium\_group  
Anaerostipes  
Cultivans  
Intestinibacter  
Brevibacterium  
Ruminococcaceae\_NK4214\_group  
Akkobacterium  
Ruminococcaceae\_UCG-014  
Brevibacterium  
UBA1819  
norank\_f\_Ruminococcaceae  
undclassified\_f\_Lachnospiraceae  
Favosibacterium  
Lachnospiraceae\_UCG-004  
Actinomyces  
Brevibacterium  
undclassified\_f\_Ruminococcaceae  
Favosibacterium  
Pantomonas  
Wessella  
Pantomonas  
undclassified\_norank\_d\_Bacteria  
Erythrobacteriaceae\_UCG-003  
Butyrivibrio  
Dialma  
[Clostridium]\_innocuum\_group  
Erythrobacterium  
Moryobacterium  
norank\_f\_Moryobacteriaceae  
Ruminococcaceae\_UCG-005  
Hemophilus  
Coffinella  
Donia  
norank\_f\_Clostridiales\_vdrB80\_group  
Oribacterium  
Bifidobacterium  
Erythrobacterium  
Clostridium\_sensu\_stricto\_1  
Hemophilus  
Akkobacterium  
[Eubacterium]\_coprostanigenes\_group  
Serratia  
Alkalicoccus  
Alkalicoccus\_2  
norank\_f\_Lachnospiraceae  
Ruminococcus\_1  
Lactobacillus  
Streptococcus  
Tyzzerella\_4  
[Eubacterium]\_silgens\_group  
Roseburia  
Lachnospira  
Ruminococcus\_torqueus\_group  
Ruminococcaceae\_UCG-002  
Lachnospiraceae\_NK4A136\_group  
Subdoligranulum  
Blautia  
Subdoligranulum  
Akkobacterium  
Pantomonas  
Pantomonas  
Pantomonas  
Akkobacterium  
Lachnospiraceae  
Valloniella  
Pantomonas  
Chryseobacterium  
Moryobacterium  
Pirella\_2  
Erythrobacterium  
Favosibacterium  
[Ruminococcus]\_gammavul\_group  
Escherichia-Shigella  
Faecalibacterium  
Pirella\_9  
Bacteroides
