# Supplementary material for: The altered metabolites contributed by dysbiosis of gut microbiota are associated with microbial translocation and immune activation during HIV infection
Source: PubMed Central journal article supplement (PMC9845923; doi:10.3389/fimmu.2022.1020822), 2023-01-04
Supplement: DataSheet_2.pdf [file DataSheet_2.pdf]

Spearman Correlation Heatmap

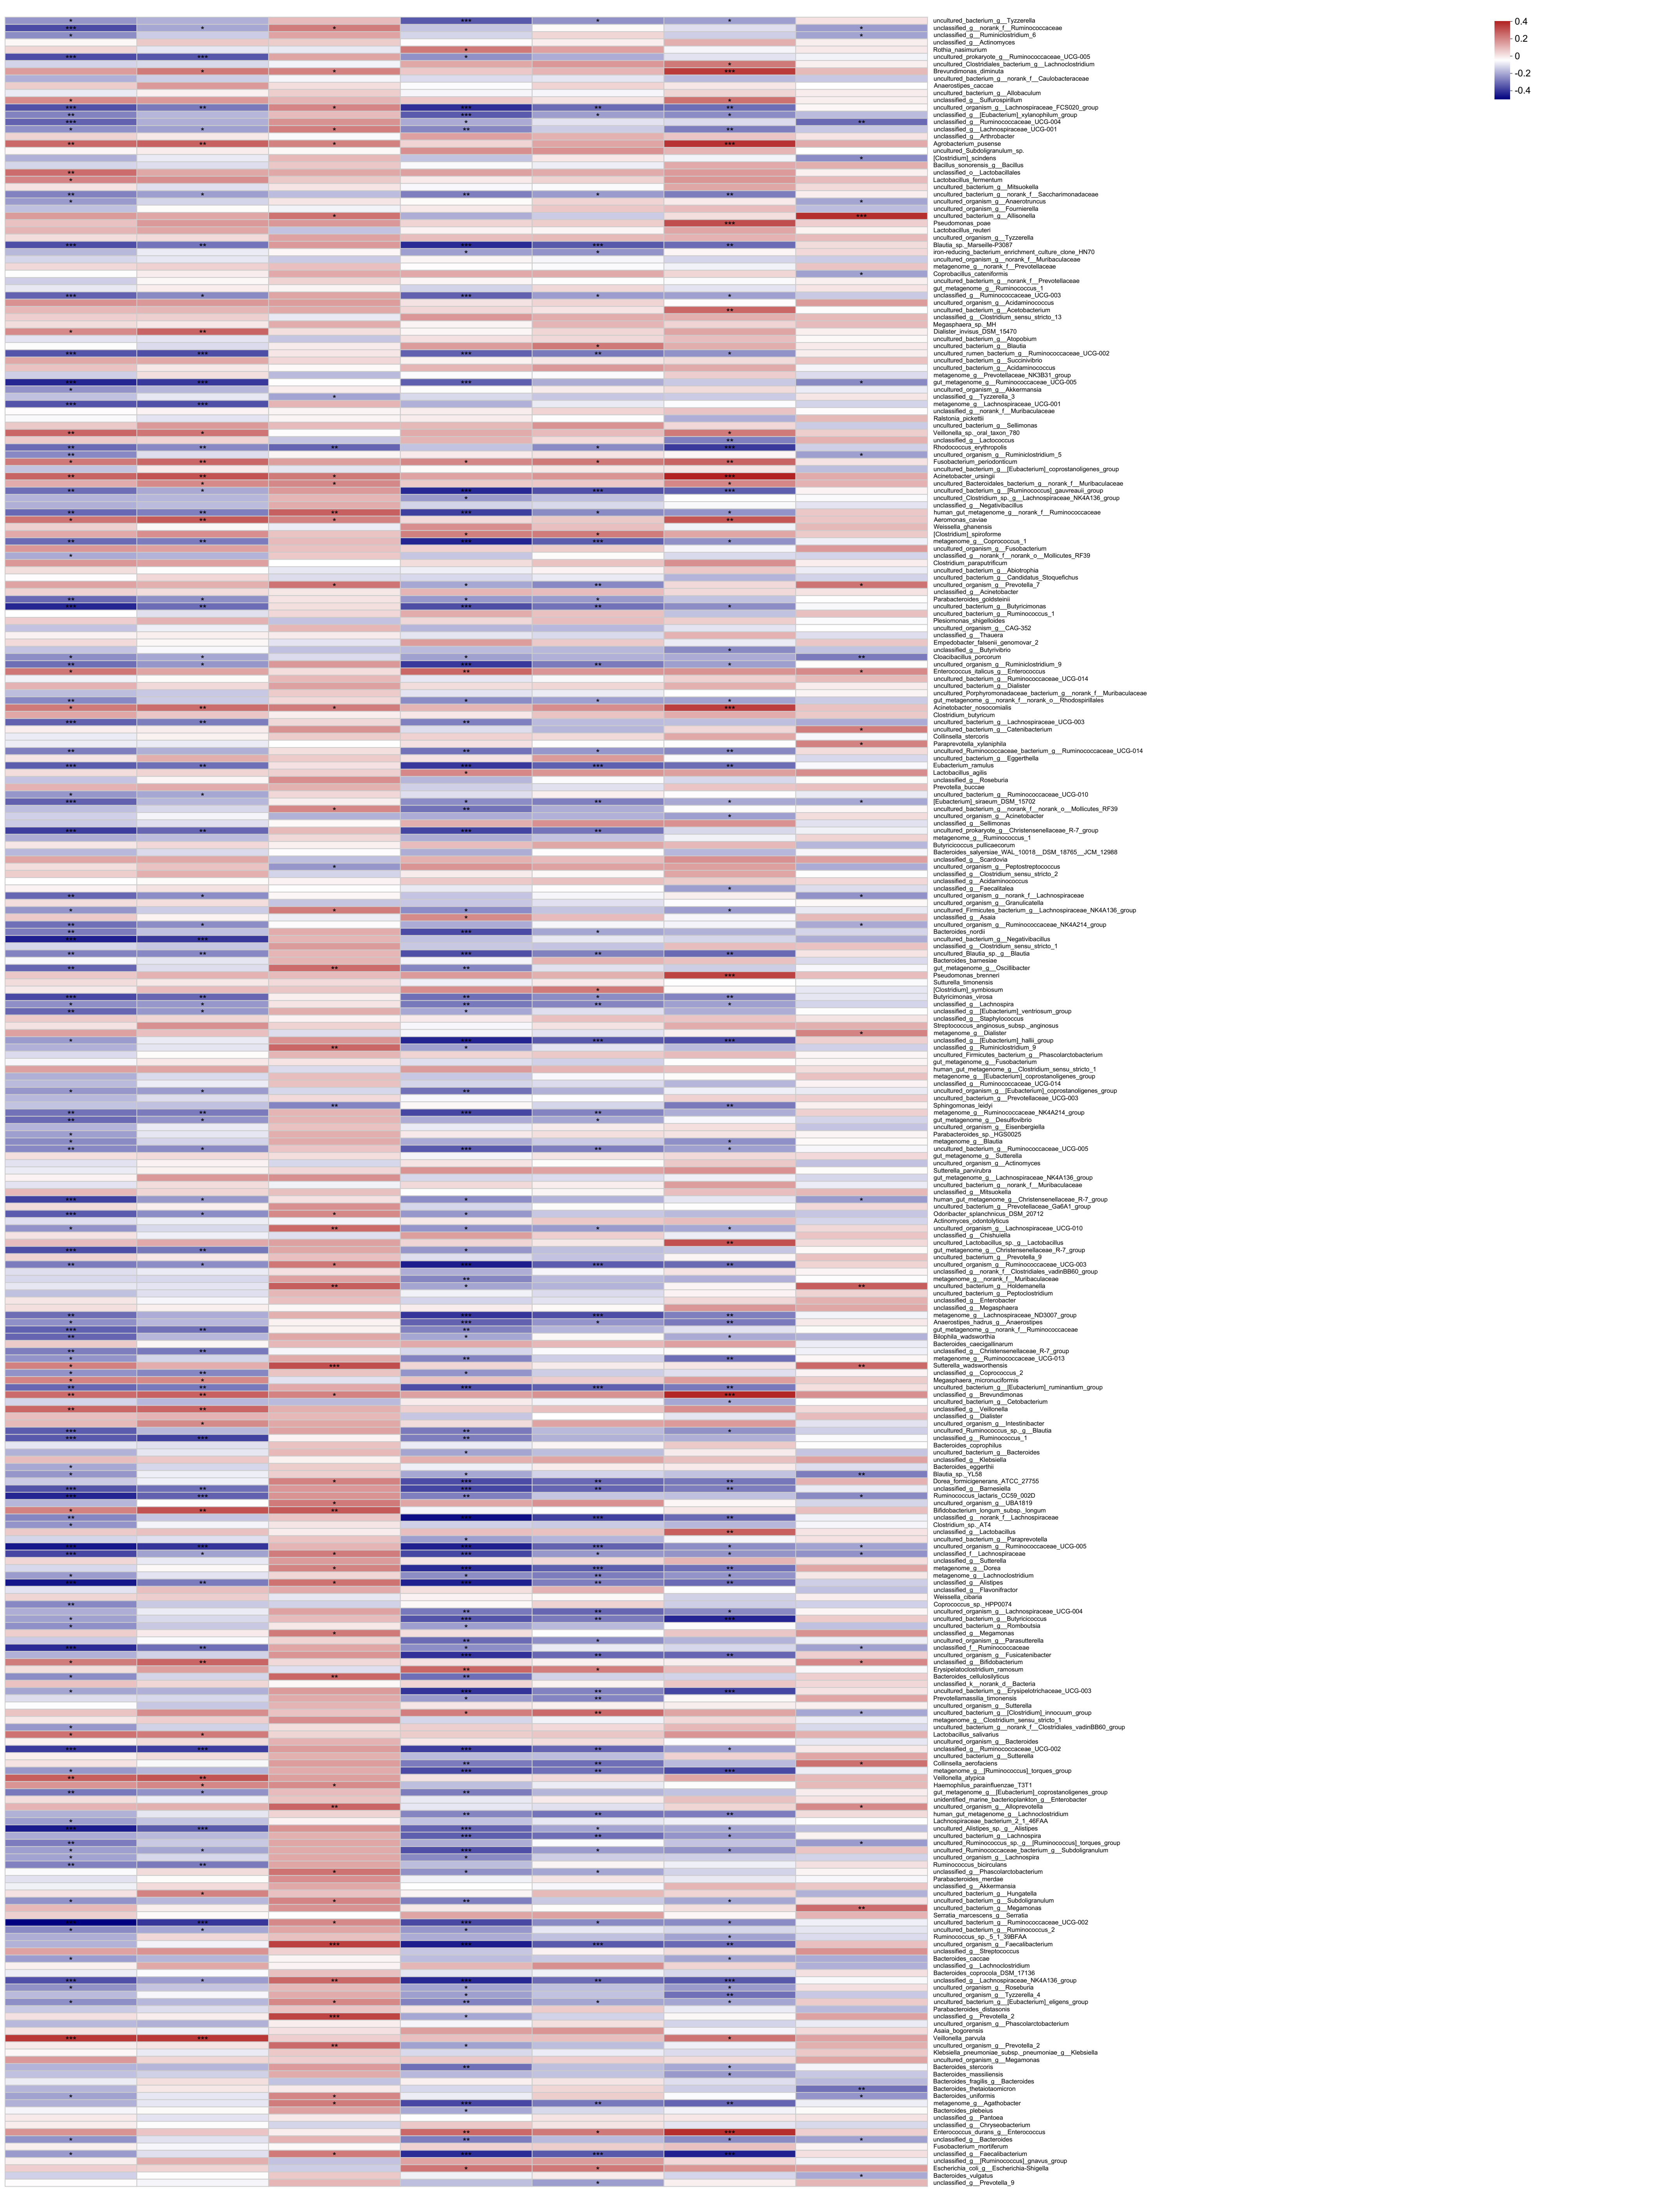

Putrescine  
N. Asaphylomacris  
Spangulobius  
Phenethylamine  
Indolpropionic  
L-Tryptophan  
Cadaverine
