# Supplementary material for: The altered metabolites contributed by dysbiosis of gut microbiota are associated with microbial translocation and immune activation during HIV infection
Source: PubMed Central journal article supplement (PMC9845923; doi:10.3389/fimmu.2022.1020822), 2023-01-04

Spearman Correlation Heatmap

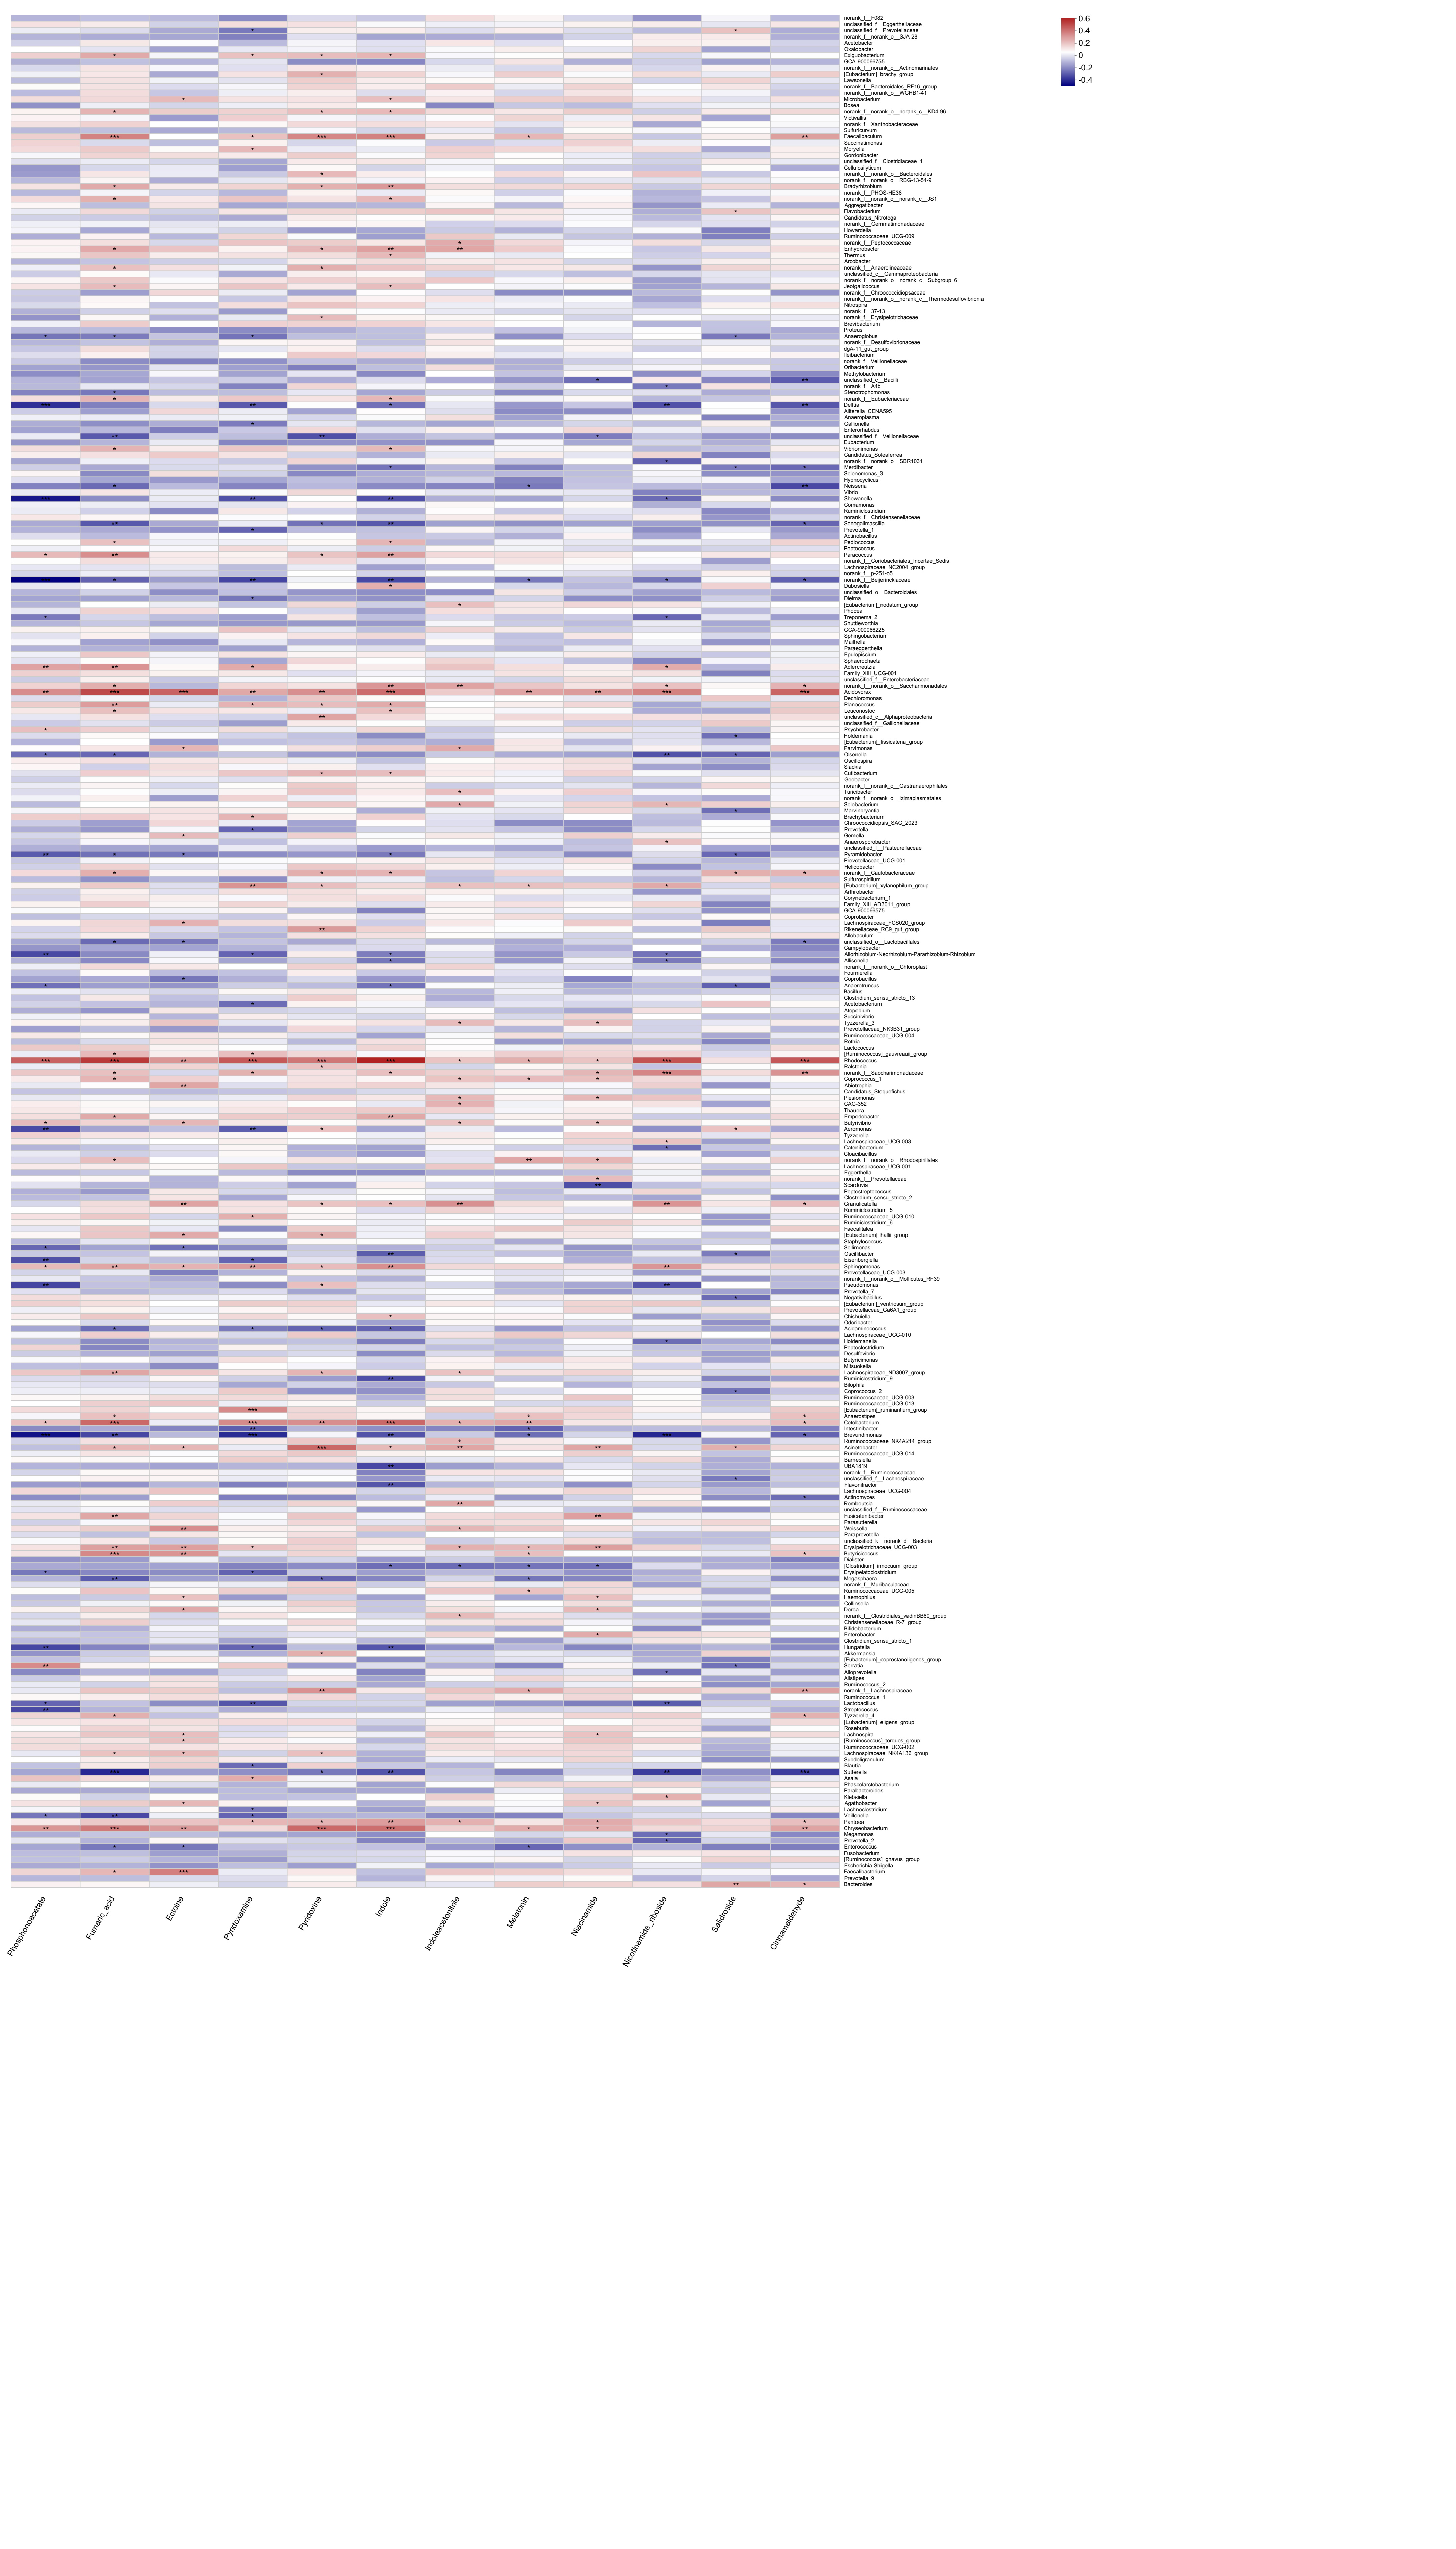

Supplement: DataSheet_3.pdf [file DataSheet_3.pdf]
