# Supplementary material for: The altered metabolites contributed by dysbiosis of gut microbiota are associated with microbial translocation and immune activation during HIV infection
Source: Front Immunol. 2023 Jan 4;13:1020822. doi: 10.3389/fimmu.2022.1020822 (PMC9845923; doi:10.3389/fimmu.2022.1020822)
Supplement: Supplementary Figure 6 — The association between bacterial species and metabolites negatively correlated with immune activation and microbial translocation. [file DataSheet_4.pdf]

Spearman Correlation Heatmap

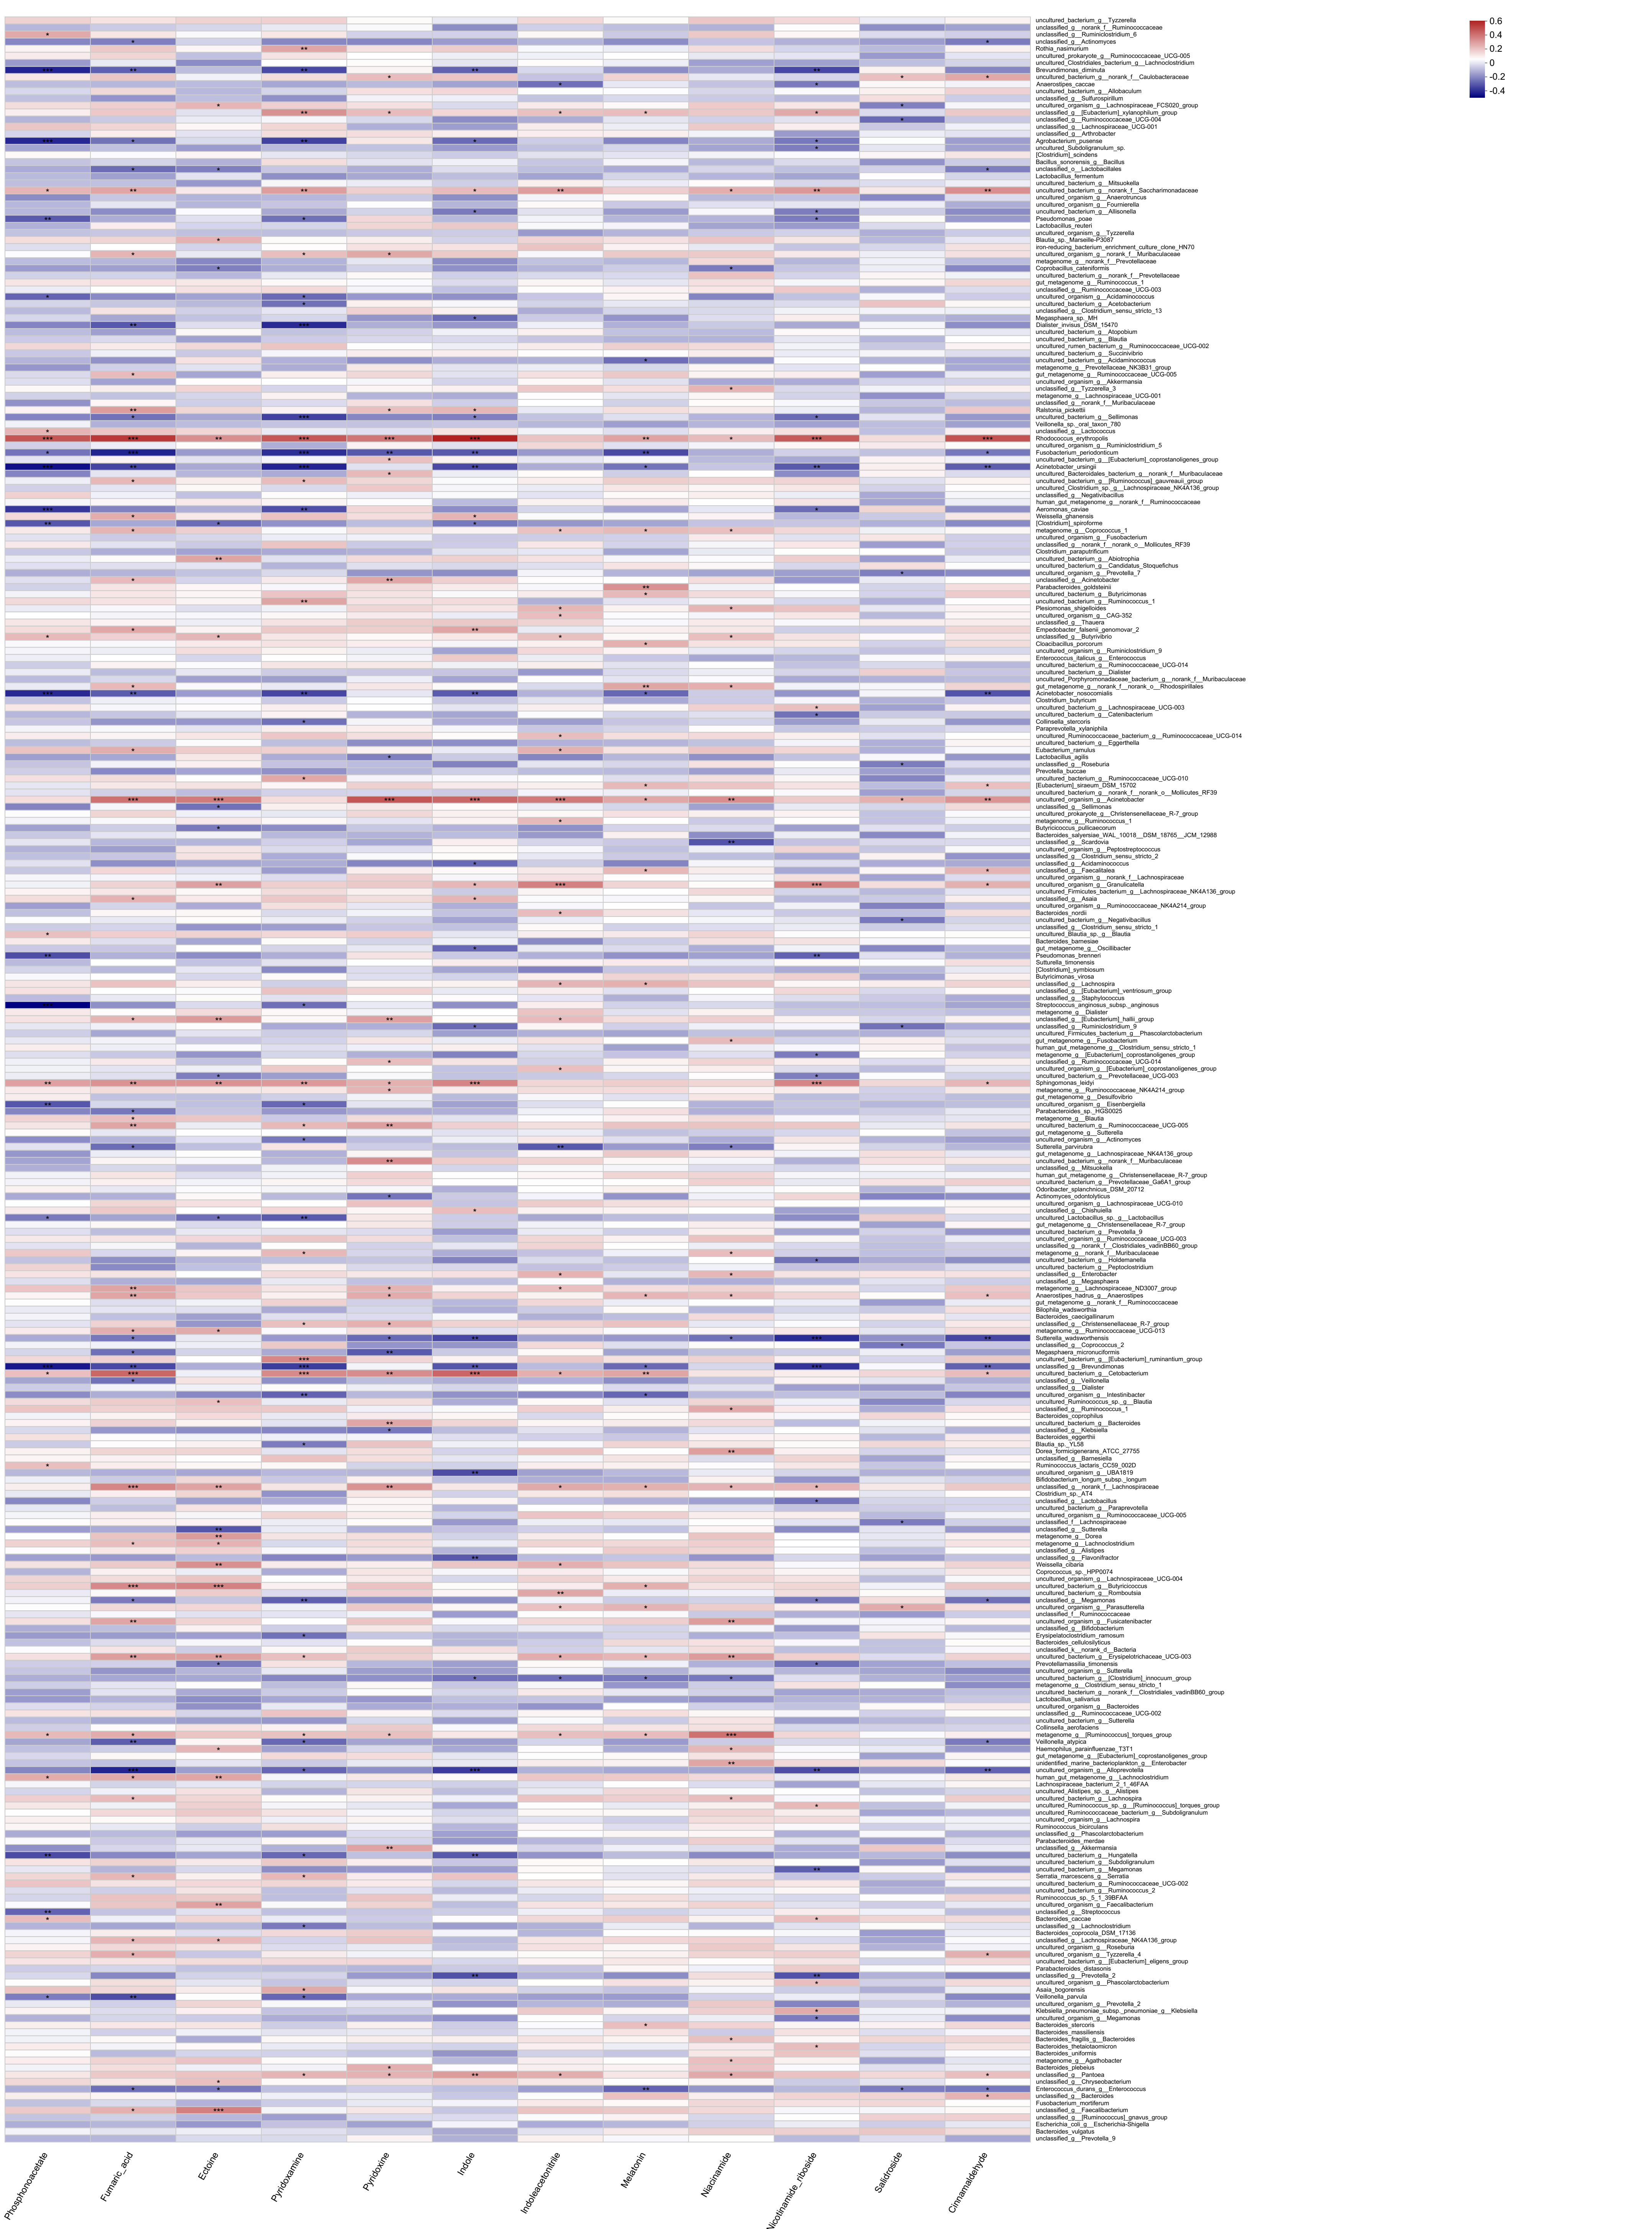

Phosphoserine  
Fumaric acid  
Ecdrine  
Pyridoxamine  
Pyridoxine  
Indole  
Indoleacetic acid  
Melatonin  
Nicotinic acid  
Nicotinamide  
Nicotinamide ribotide  
Salicylic acid  
Cinnamylaldehyde
